# Supplementary material for: Efficacy of an asynchronous telerehabilitation program in post-COVID-19 patients: A protocol for a pilot randomized controlled trial
Source: PubMed Central journal article supplement (PMC9295945; doi:10.1371/journal.pone.0270766), 2022-07-19
Supplement: pone.0270766.s004.pdf [file pone.0270766.s004.pdf]

Ms. María González Hinjos, Secretary of CEIC Aragón (CEICA)

**CERTIFIES**

That the CEIC Aragón (CEICA) in its meeting of 24/02/2021, Act N° 04/2021 has evaluated the investigator's proposal referred to the study:

**Title: Efficacy of an asynchronous telerehabilitation programme in post-COVID-19 patients: feasibility study.**

**Principal Investigators: Sandra Calvo Carrión and Carolina Jiménez Sánchez**

**Protocol version: V 23/02/20214**

**Information and consent document version: V 4 23/02/2021 2º.**

Considers that

- The project is planned in accordance with the requirements of Law 14/2007, of 3July, on Biomedical Research, and its implementation is relevant.
- The necessary requirements for the appropriateness of the protocol in relation to the objectives of the study are met and the foreseeable risks and discomfort to the subject are justified.
- The use of the data and the documents drawn up for obtaining consent is appropriate.
- The extent of the financial compensation provided for does not interfere with respect for ethical principles.
- The capacity of the Investigators and the means available are appropriate to carry out the study.

**3º.** Therefore, this CEIC issues a **FAVOURABLE OPINION to carry out the study.**

What I sign in Zaragoza

**GONZALEZ  
HINJOS  
MARIA - DNI  
03857456B**

Digitally signed by  
GONZALEZ HINJOS  
MARIA - DNI  
03857456B  
Date: 2021.02.26  
09:50:14 +01'00'

María González Hinjos  
Secretary of CEIC Aragón (CEICA)

Ms. María González Hinjos, Secretary of CEIC Aragón (CEICA)

**CERTIFIES**

That the CEIC Aragón (CEICA) in its meeting of 21/04/2021, Act N° 08/2021 has evaluated the proposal of relevant modification referred to the study:

**Title: Efficacy of an asynchronous telerehabilitation programme in post-COVID-19 patients: feasibility study.**

**Principal Investigators: Sandra Calvo Carrión and Carolina Jiménez Sánchez**

**2nd.** This amendment proposes:

- Inclusion of a new centre: Royo Villanova Hospital.
- Modification of the research team
- Protocol version: V5 of 12/04/2021
- Information and Consent Document Version: V5 of 12/04/2021

**3º.** Considers that

- The project is planned in accordance with the requirements of Law 14/2007, of 3July, on Biomedical Research, and its implementation is relevant.
- The necessary requirements for the appropriateness of the protocol in relation to the objectives of the study are met and the foreseeable risks and discomfort to the subject are justified.
- The use of the data and the documents drawn up for obtaining consent is appropriate.
- The extent of the financial compensation provided for does not interfere with respect for ethical principles.
- The capacity of the Investigators and the means available are appropriate to carry out the study.

**4º.** Therefore, this CEIC issues a **FAVOURABLE OPINION to carry out the study and the modifications requested.**

What I sign in Zaragoza  
**GONZALEZ**  
**HINJOS**  
**MARIA -**  
**03857456B**

Digitally signed by  
GONZALEZ HINJOS  
MARIA - DNI  
03857456B Date:  
2021.04.26  
13:25:49 +02'00'

María González Hinjos  
Secretary of CEIC Aragón (CEICA)
